# Supplementary material for: Antibacterial Activity of AI-Hemocidin 2, a Novel N-Terminal Peptide of Hemoglobin Purified from Arca inflata
Source: MDPI journal article supplement (doi:10.3390/md15070205), 2017-06-29
Supplement: s1 [file s1]

# Supplementary Materials: Antibacterial Activity of AI-Hemocidin 2, a Novel N-Terminal Peptide of Hemoglobin Purified from *Arca inflata*

Chunlei Li <sup>1,†</sup>, Jianhua Zhu <sup>1,†</sup>, Yanqing Wang <sup>2,†</sup>, Yuyan Chen <sup>1</sup>, Liyan Song <sup>3</sup>, Weiming Zheng <sup>3</sup>, Jingjing Li <sup>3</sup> and Rongmin Yu <sup>1,3,\*</sup>

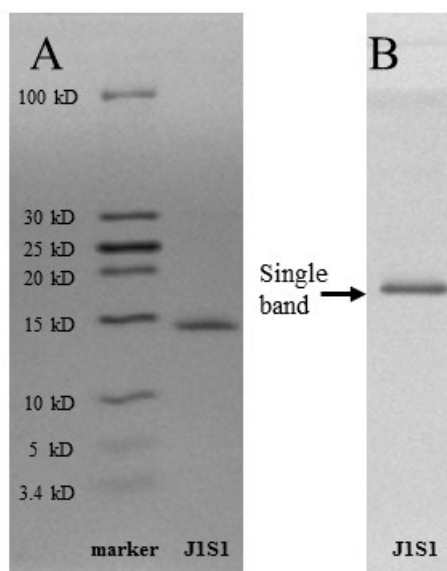

**Figure S1.** Purity confirmation of J1S1. (A) The result of Tricine-SDS-PAGE; (B) The result of Native PAGE.

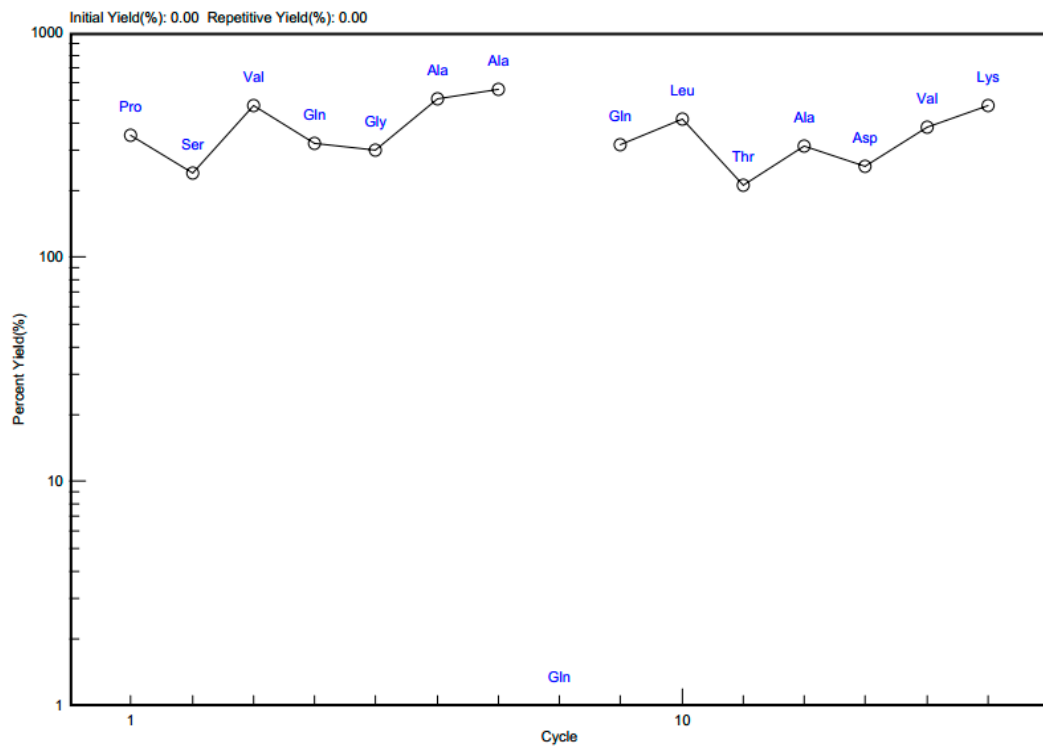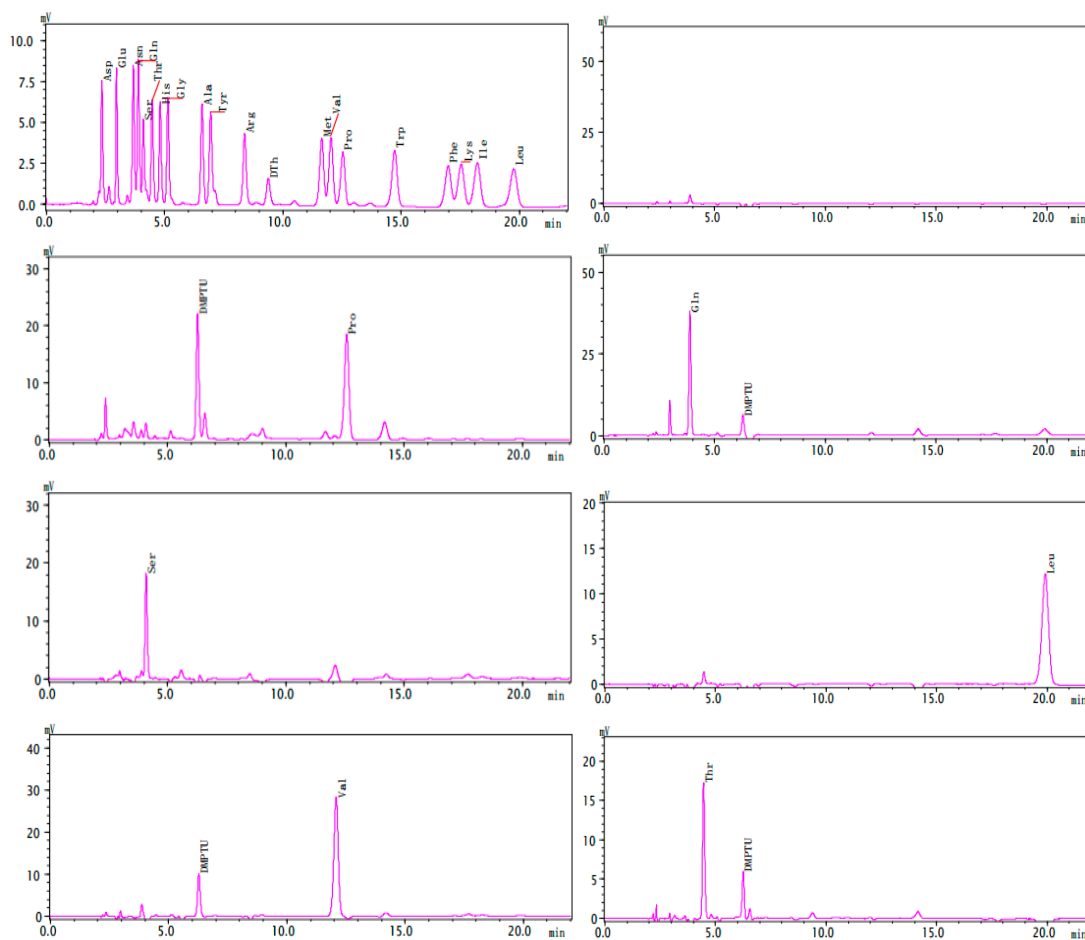

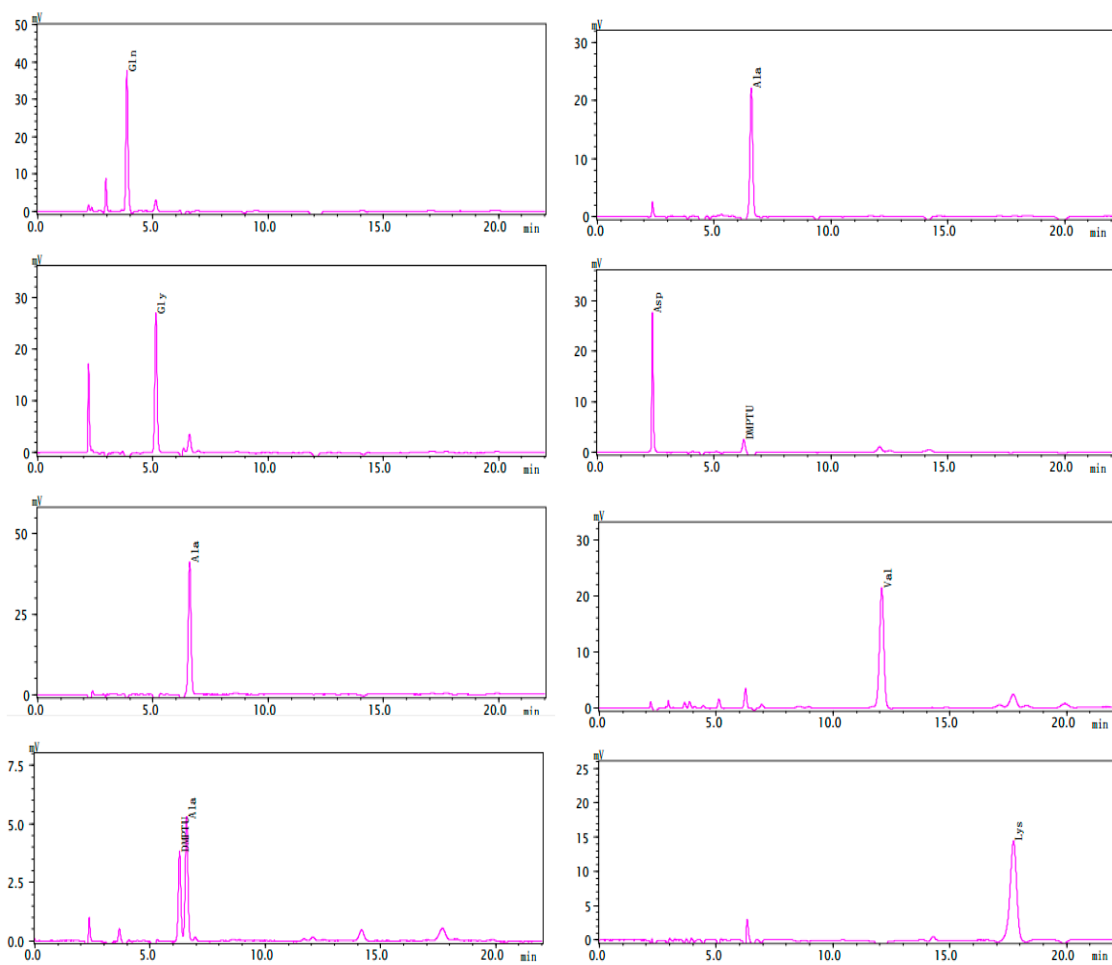

**Figure S2.** Results of N-terminal amino acid sequencing of Hb-I.
